# Supplementary material for: Pharmacologic activation of autophagy without direct mTOR inhibition as a therapeutic strategy for treating dry macular degeneration
Source: publisher site journal article supplement (doi:10.18632/aging.202974), 2021-04-19
Supplement: Supplementary file [file aging-v13i8-202974-supplementary-material-SD2.pdf]

## SUPPLEMENTARY TABLE

Supplementary Table 1. Commercial sources for autophagy inducers in this study.

| Name                                   | Abbreviation | Company              | Product number  |
|----------------------------------------|--------------|----------------------|-----------------|
| <b>GSK 1059615</b>                     | <b>GSK</b>   | <b>Sigma-Aldrich</b> | <b>SML0083</b>  |
| <b>Torin1</b>                          | <b>Torin</b> | <b>ApexBio</b>       | <b>A8312</b>    |
| <b>D4476</b>                           |              | <b>Cayman</b>        | <b>13305</b>    |
| <b>Flubendazole</b>                    | <b>FLBZ</b>  | <b>Sigma-Aldrich</b> | <b>34091</b>    |
| <b>Amiodarone</b>                      |              | <b>Cayman</b>        | <b>15213</b>    |
| <b>GW7647</b>                          |              | <b>Cayman</b>        | <b>10008613</b> |
| <b>JNJ-47965567</b>                    | <b>JNJ</b>   | <b>Cayman</b>        | <b>21895</b>    |
| 2-Acetyl-5-tetrahydroxybutyl Imidazole | THI          | Cayman               | 13222           |
| Ac-Calpastatin                         |              | Cayman               | 16501           |
| AZ-10606120                            |              | Tocris               | 3323            |
| Bortezomib                             |              | Cayman               | 10008822        |
| BRD5631                                |              | Broad Institute      | MTA*            |
| Carbamazepine                          |              | Sigma-Aldrich        | C4024           |
| Clonidine                              |              | Sigma-Aldrich        | C7897           |
| Entinostat                             | MS-275       | Cayman               | 13284           |
| Erlotinib                              |              | Cayman               | 10483           |
| Fasudil                                | HA-1077      | Cayman               | 10010559        |
| Fenofibrate                            |              | Cayman               | 10005368        |
| Fluphenazine                           |              | MP Biomedical        | ICN15370691     |
| K604                                   |              | Otava LTD            | 7070707145      |
| Loperamide                             |              | Cayman               | 14875           |
| Metformin                              |              | Cayman               | 13118           |
| ML246                                  | Metarrestin  | AOBious              | AOB1384         |
| Mocetinostat                           |              | Cayman               | 18287           |
| Nilotinib                              |              | Cayman               | 10010422        |
| Nilvadipine                            |              | Sigma-Aldrich        | SML0945         |
| Oxaprozin                              |              | Cayman               | 15476           |
| Rilmenidine                            |              | Sigma-Aldrich        | R134            |
| Saroglitazar                           |              | Zydus-Cadila         | MTA*            |
| Sertraline                             |              | Cayman               | 14839           |
| Spermidine                             |              | Sigma-Aldrich        | S2626           |
| Trifluoperazine                        |              | Sigma-Aldrich        | T8516           |
| (±)-Verapamil                          |              | Sigma-Aldrich        | V4629           |

Direct mTOR inhibitors that induced autophagy in primary human fetal RPE cultures are highlighted in red. Compounds that do not directly inhibit mTOR but did induce autophagy in RPE cultures by both analysis of LC3 lipidation and LC3 puncta formation are highlighted in orange. Compounds that induced autophagy in RPE culture by only LC3 lipidation but not puncta formation are highlighted in green. All other compounds failed to induce LC3 lipidation in RPE cultures. \*=Materials Transfer Agreement.
